# Supplementary material for: Optimizing Microfluidic Impedance Cytometry by Bypass Electrode Layout Design
Source: MDPI journal article supplement (doi:10.3390/bios14040204), 2024-04-19
Supplement: s1 [file s1]

## Supplementary Materials

# Optimizing Microfluidic Impedance Cytometry by Bypass Electrode Layout Design

Guangzu Wu <sup>1,2</sup>, Zhiwei Zhang <sup>1,2</sup>, Manman Du <sup>3</sup>, Dan Wu <sup>4</sup>, Junting Zhou <sup>4</sup>, Tianteng Hao <sup>4</sup> and Xinwu Xie <sup>1,2,\*</sup>

<sup>1</sup> Systems Engineering Institute, Academy of Military Sciences, People's Liberation Army, Tianjin 300161, China

<sup>2</sup> National Bio-Protection Engineering Center, Tianjin 300161, China

<sup>3</sup> School of Environmental Science and Engineering, Tianjin University, Tianjin 300072, China

<sup>4</sup> School of Electronic Information and Automation, Tianjin University of Science and Technology, Tianjin 300222, China

\* Correspondence: [xinwuxie@163.com](mailto:xinwuxie@163.com)

# 1 Bypass electrode layout

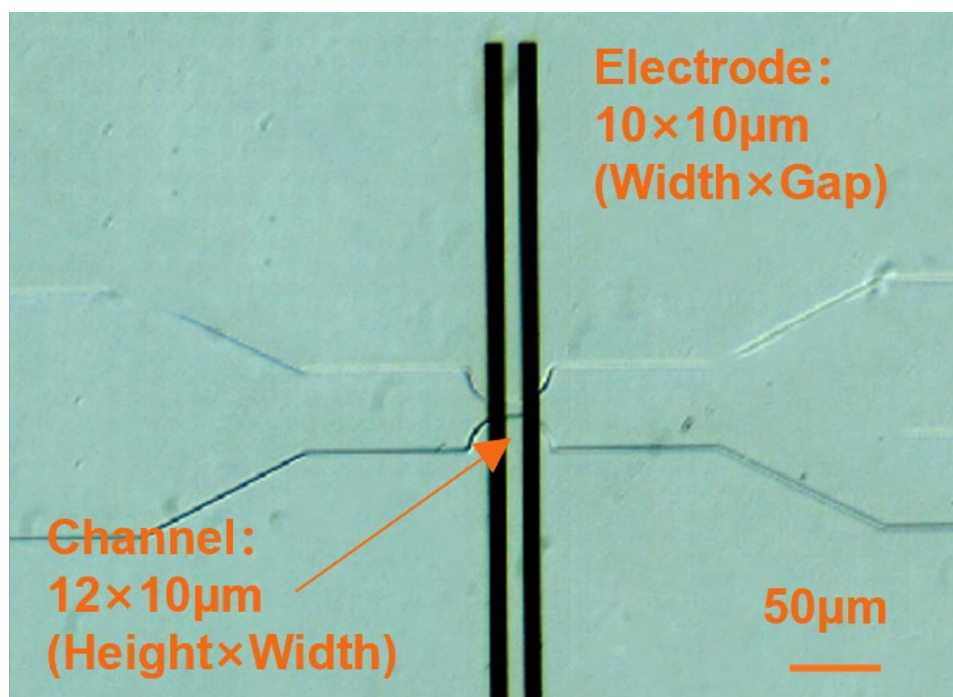

**Figure S1.** Conventional detection electrode layout (no bypass) was captured by a CCD camera.

## 2 Electric field simulation

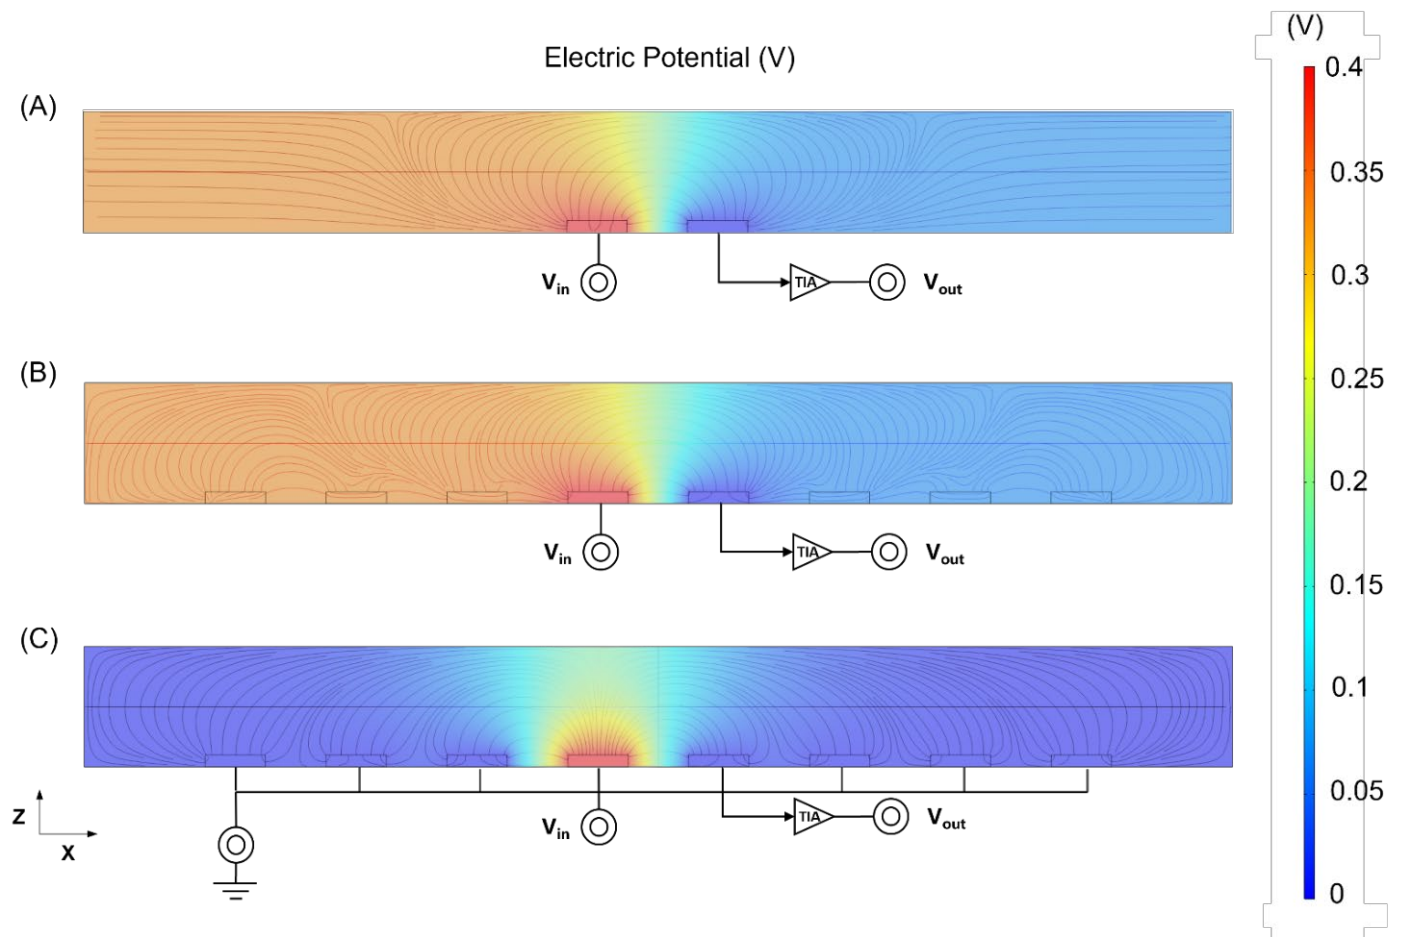

**Figure S2.** The electric field simulation of the three bypass states with an 8-electrode MIC chip: (A) no bypass, (B) FFF, (C) GGG.

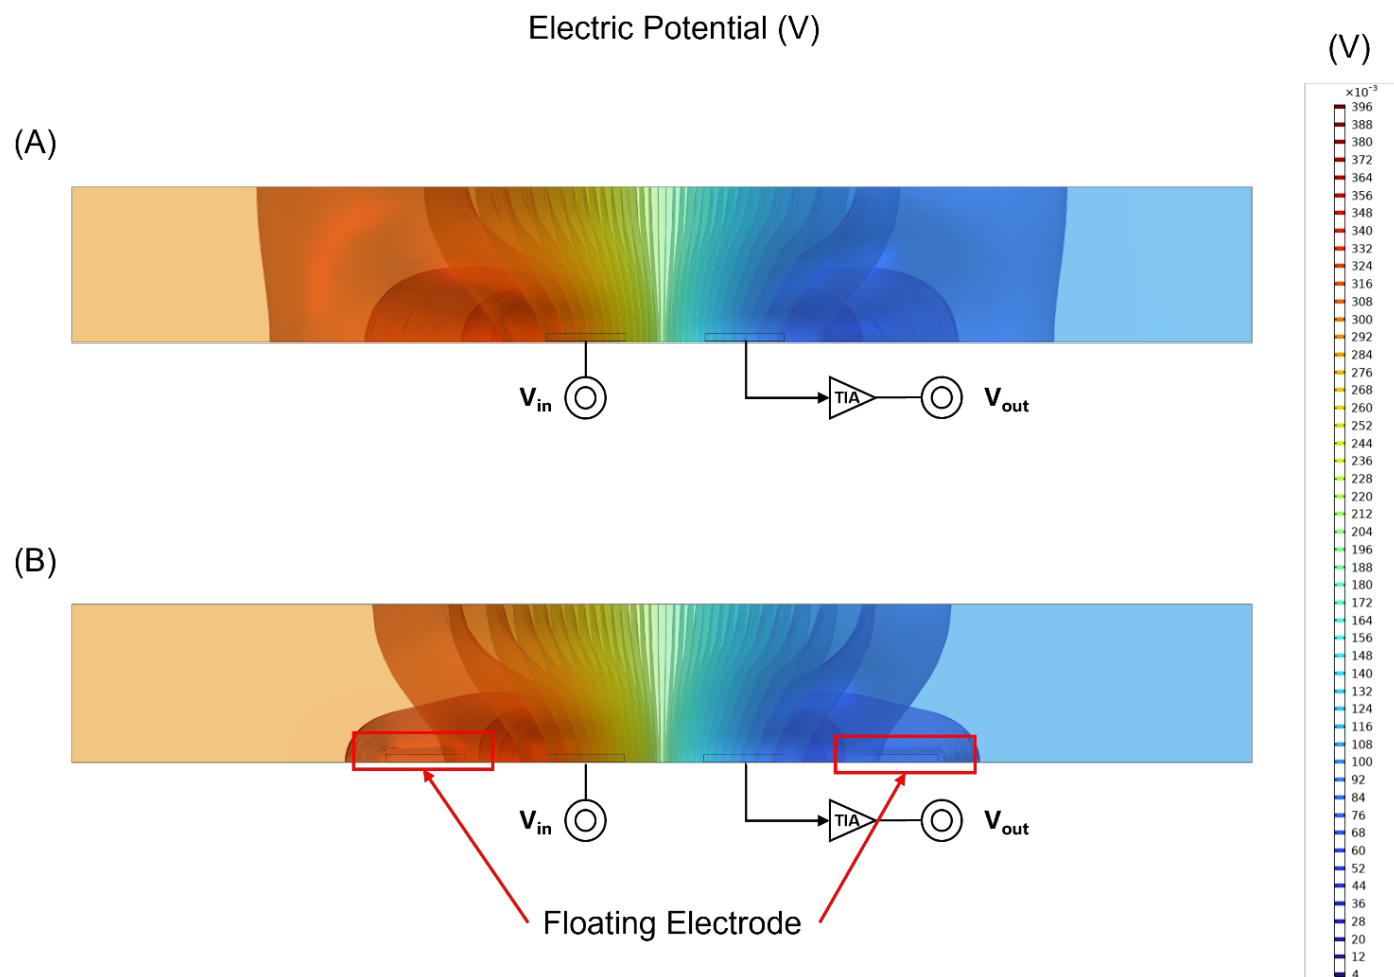

**Figure S3.** Simulation of equipotential planes. (A) No bypass electrode layout. (B) Floating electrode layout.

When 50 equipotential planes with the same drop were set up in COMSOL, it can be observed that the electric potential of the bypass floating electrode was more concentrated than that of the no bypass electrode.

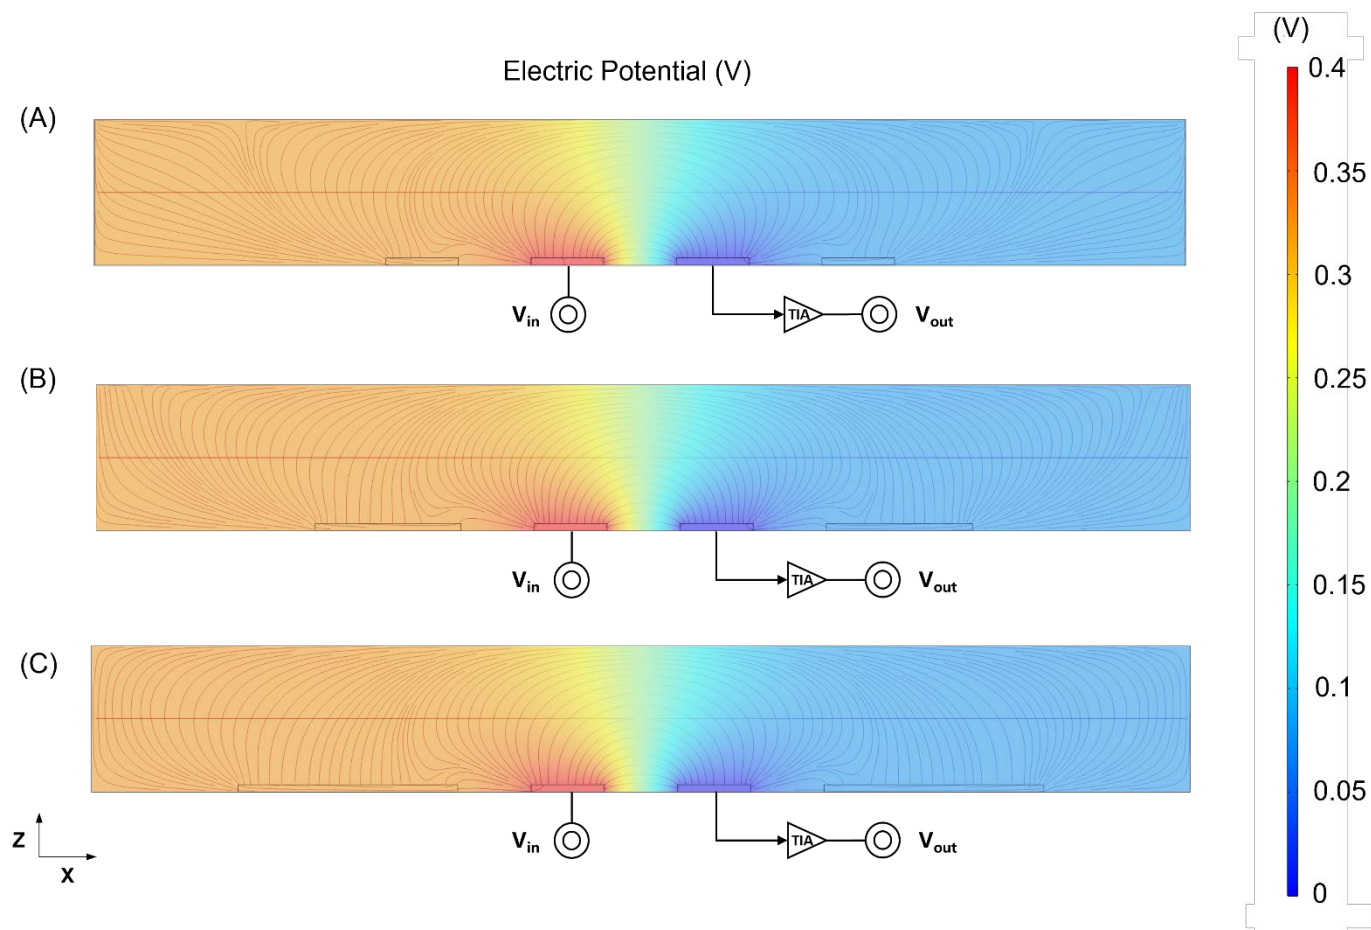

**Figure S4.** The electric field simulation of the different bypass floating electrode areas (the electrode length is the same, but the width is different): (A) 10  $\mu\text{m}$ , (B) 20  $\mu\text{m}$ , (C) 30  $\mu\text{m}$ .

### 3 Results were calculated from raw data

**Table S1.** Impedance data for **no bypass and FFF electrode layout** (electrode:  $10 \times 10 \mu\text{m}$  (width  $\times$  gap), channel:  $10 \times 10 \times 12 \mu\text{m}$  (length  $\times$  width  $\times$  height))

| Electrode<br>Layout | Amplitude<br>( $\mu\text{V}$ ) | CV of<br>Amplitude<br>(%) | Detection<br>Throughput<br>(cells/mins) | SNB<br>(dB) | Phase<br>(Rad)   | CV of<br>Phase<br>(%) | Noise<br>( $\mu\text{V}$ ) |
|---------------------|--------------------------------|---------------------------|-----------------------------------------|-------------|------------------|-----------------------|----------------------------|
| No Bypass1          | $32.59 \pm 6.35$               | 19.48                     | 13.48                                   | 17.81       | $0.88 \pm 0.075$ | 8.51                  | 4.11                       |
| No Bypass2          | $32.26 \pm 6.03$               | 18.69                     | 11.43                                   | 17.66       | $0.82 \pm 0.051$ | 6.22                  | 4.14                       |
| No Bypass3          | $32.56 \pm 6.28$               | 19.03                     | 15.57                                   | 17.44       | $0.92 \pm 0.044$ | 4.73                  | 4.34                       |
| FFF1                | $20.63 \pm 1.79$               | 8.67                      | 14.60                                   | 20.77       | $0.94 \pm 0.030$ | 3.17                  | 1.88                       |
| FFF2                | $21.15 \pm 2.48$               | 11.72                     | 11.89                                   | 22.23       | $0.96 \pm 0.028$ | 2.88                  | 1.62                       |
| FFF3                | $21.12 \pm 1.79$               | 8.49                      | 16.18                                   | 21.85       | $1.01 \pm 0.033$ | 3.23                  | 1.73                       |

**<sup>1</sup>Notes:** The CVs are obtained by processing the original data; No Bypass: there is no bypass electrode except input and output working electrode pair; F: the bypass electrode is floating; G: the bypass electrode is connected to the ground. **(Same as in the remaining tables.)**

CV(%)=Standard deviation/Mean

Detection Throughput (cells/mins)=Particle\_number (cells)/Times (mins)

SNB(dB)= $20 \times \log_{10}(\text{Mean}_{\text{Amplitude}}(\text{V})/\text{Noise}(\text{V}))$

Noise= $\sqrt{(3 \times \sigma_{\text{ZRE}})^2 + (3 \times \sigma_{\text{ZIM}})^2}$

**Table S2.** Impedance data for **FFF and GGG electrode layout** (electrode:  $10 \times 10 \mu\text{m}$  (width  $\times$  gap), channel:  $10 \times 10 \times 12 \mu\text{m}$  (length  $\times$  width  $\times$  height))

| Electrode<br>Layout | Amplitude<br>( $\mu\text{V}$ ) | CV of<br>Amplitude<br>(%) | Detection<br>Throughput<br>(cells/mins) | SNB<br>(dB) | Phase<br>(Rad)   | CV of<br>Phase<br>(%) | Noise<br>( $\mu\text{V}$ ) |
|---------------------|--------------------------------|---------------------------|-----------------------------------------|-------------|------------------|-----------------------|----------------------------|
| FFF1                | $20.63 \pm 1.79$               | 8.67                      | 14.60                                   | 20.77       | $0.94 \pm 0.030$ | 3.17                  | 1.88                       |
| FFF2                | $21.15 \pm 2.48$               | 11.72                     | 11.89                                   | 22.23       | $0.96 \pm 0.028$ | 2.88                  | 1.62                       |
| FFF3                | $21.12 \pm 1.79$               | 8.49                      | 16.18                                   | 21.85       | $1.01 \pm 0.033$ | 3.23                  | 1.73                       |
| GGG1                | $19.53 \pm 2.18$               | 11.17                     | 25.50                                   | 28.72       | $0.86 \pm 0.021$ | 2.46                  | 0.707                      |

|      |                  |       |       |       |                  |      |       |
|------|------------------|-------|-------|-------|------------------|------|-------|
| GGG2 | $21.83 \pm 2.47$ | 11.33 | 29.00 | 29.50 | $0.86 \pm 0.019$ | 2.19 | 0.726 |
| GGG3 | $22.20 \pm 1.14$ | 5.13  | 29.50 | 29.88 | $0.87 \pm 0.015$ | 1.70 | 0.711 |

**Table S3.** Impedance data for **diverse width of grounding electrode** (electrode:  $10 \times 10 \mu\text{m}$  (width  $\times$  gap), channel:  $10 \times 10 \times 12 \mu\text{m}$  (length  $\times$  width  $\times$  height))

| Electrode<br>Layout | Amplitude<br>( $\mu\text{V}$ ) | CV of<br>Amplitude<br>(%) | Detection<br>Throughput<br>(cells/mins) | SNB<br>(dB) | Phase<br>(Rad)   | CV of<br>Phase<br>(%) | Noise<br>( $\mu\text{V}$ ) |
|---------------------|--------------------------------|---------------------------|-----------------------------------------|-------------|------------------|-----------------------|----------------------------|
| FFF1                | $20.63 \pm 1.79$               | 8.67                      | 14.60                                   | 20.77       | $0.94 \pm 0.030$ | 3.17                  | 1.88                       |
| FFF2                | $21.15 \pm 2.48$               | 11.72                     | 11.89                                   | 22.23       | $0.96 \pm 0.028$ | 2.88                  | 1.62                       |
| FFF3                | $21.12 \pm 1.79$               | 8.49                      | 16.18                                   | 21.85       | $1.01 \pm 0.033$ | 3.23                  | 1.73                       |
| FFG1                | $18.78 \pm 3.33$               | 17.73                     | 26.55                                   | 26.42       | $1.11 \pm 0.030$ | 2.71                  | 0.881                      |
| FFG2                | $20.58 \pm 2.76$               | 13.40                     | 25.00                                   | 25.93       | $1.16 \pm 0.025$ | 2.18                  | 1.03                       |
| FFG3                | $21.16 \pm 2.74$               | 12.94                     | 26.54                                   | 26.04       | $1.21 \pm 0.031$ | 2.58                  | 1.05                       |
| FGG1                | $18.60 \pm 2.36$               | 12.70                     | 27.00                                   | 27.19       | $1.11 \pm 0.035$ | 3.19                  | 0.807                      |
| FGG2                | $16.67 \pm 2.22$               | 13.33                     | 31.75                                   | 26.90       | $1.01 \pm 0.029$ | 2.82                  | 0.746                      |
| FGG3                | $17.72 \pm 2.08$               | 11.73                     | 33.50                                   | 27.19       | $1.07 \pm 0.030$ | 2.80                  | 0.739                      |
| GGG1                | $19.53 \pm 2.18$               | 11.17                     | 25.50                                   | 28.72       | $0.86 \pm 0.021$ | 2.46                  | 0.707                      |
| GGG2                | $21.83 \pm 2.47$               | 11.33                     | 29.00                                   | 29.50       | $0.86 \pm 0.019$ | 2.19                  | 0.726                      |
| GGG3                | $22.20 \pm 1.14$               | 5.13                      | 29.50                                   | 29.88       | $0.87 \pm 0.015$ | 1.70                  | 0.711                      |

#### 4 Calculation of concentration

The **actual detection beads concentration** of the FFF layout is  $(0.0152\sim0.0190) \times 10^9$  cells/mL.

The **actual detection beads concentration** of the FFG layout is  $(0.0265\sim0.0331) \times 10^9$  cells/mL.

The **actual detection beads concentration** of the FGG layout is  $(0.0305\sim0.0382) \times 10^9$  cells/mL.

The **actual detection beads concentration** of the GGG layout is  $(0.0414\sim0.0518) \times 10^9$  cells/mL.

According to the results of the **hemocytometer calculation**, the concentration of the bead suspension medium ( $\Phi$  5  $\mu$ m) to be measured was calculated three times, and the results were  $0.0375 \times 10^9$  cells/mL,  $0.035 \times 10^9$  cells/mL, and  $0.049 \times 10^9$  cells/mL, respectively. And the average concentration of the hemocytometer is  $0.0405 \times 10^9$  cells/mL.

The average concentration is  $0.0177 \times 10^9$ ,  $0.0298 \times 10^9$ ,  $0.03435 \times 10^9$ , and  $0.0466 \times 10^9$  cells/mL for FFF, FFG, FGG, and GGG, respectively.
